# Supplementary material
Source: bioRxiv or medRxiv preprint supplement (https://medrxiv.org/highwire/filestream/70402/field_highwire_adjunct_files/1/19011833-2.pdf)

**Oscillibacter spp**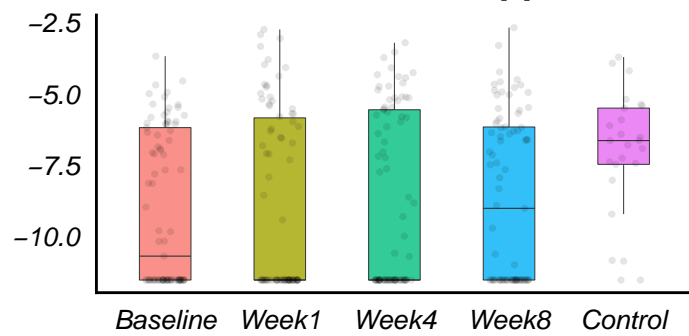**Bacteroides ovatus**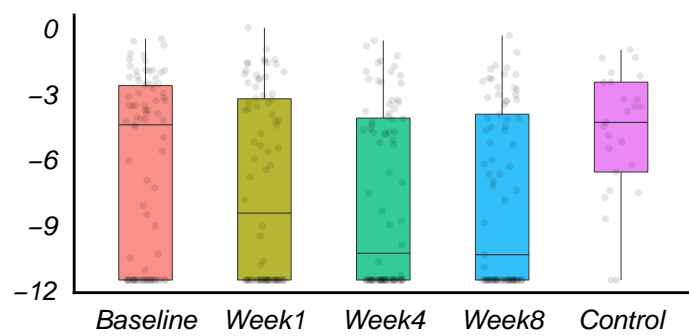**Alistipes putredinis**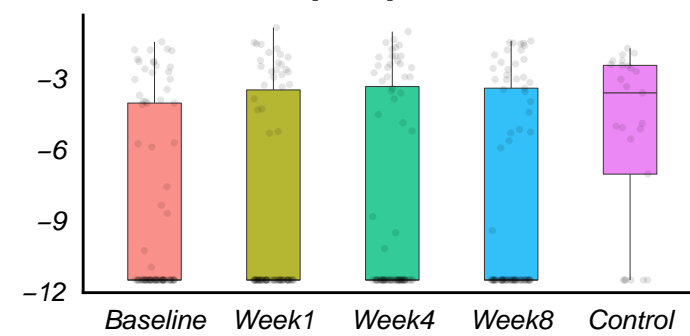**Ruminococcus obeum**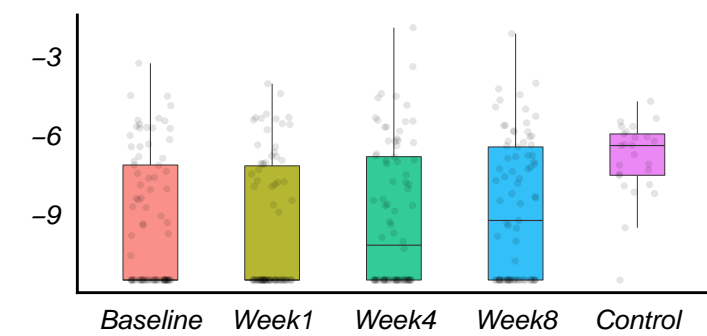**Alistipes finegoldii**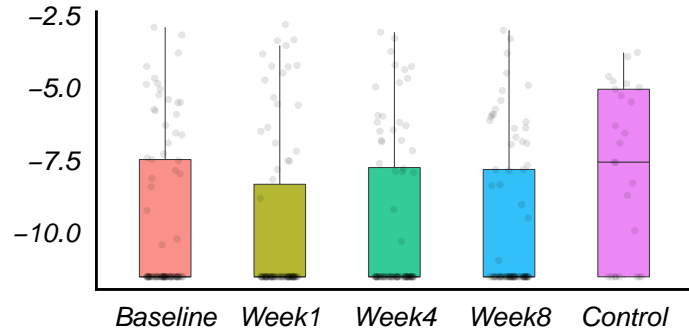**Lachnospiraceae bacterium 7 1 58FAA**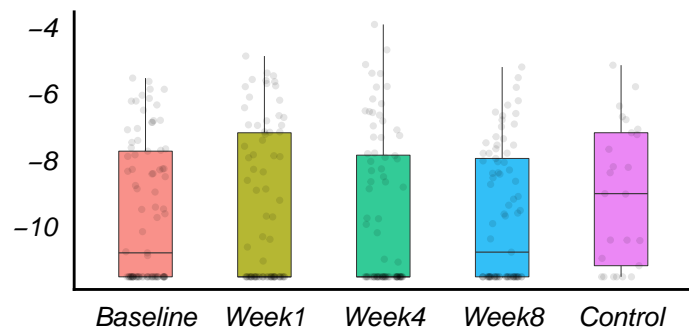**Bacteroides uniformis**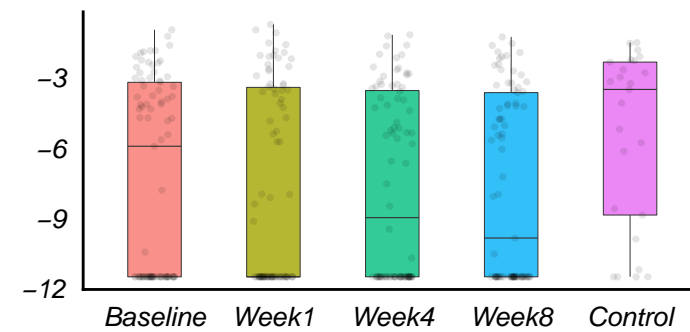**Parabacteroides spp**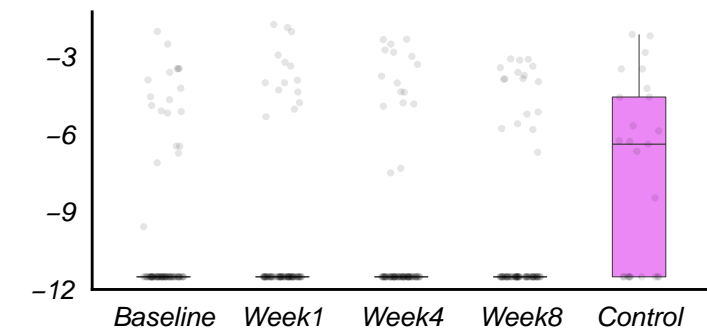**Roseburia hominis**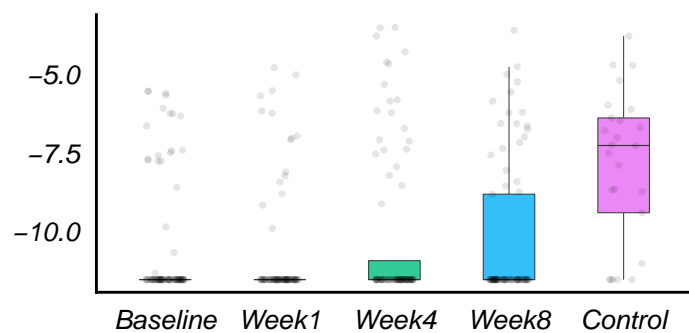**Roseburia intestinalis**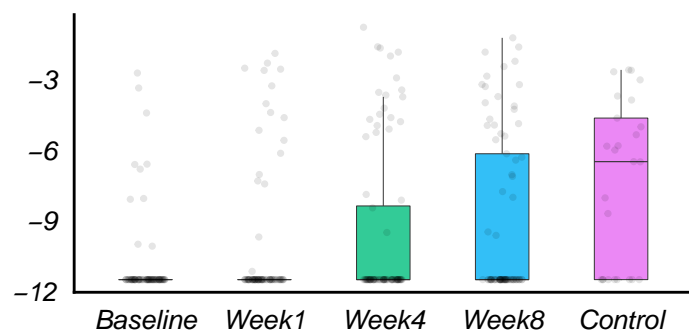**Bacteroides dorei**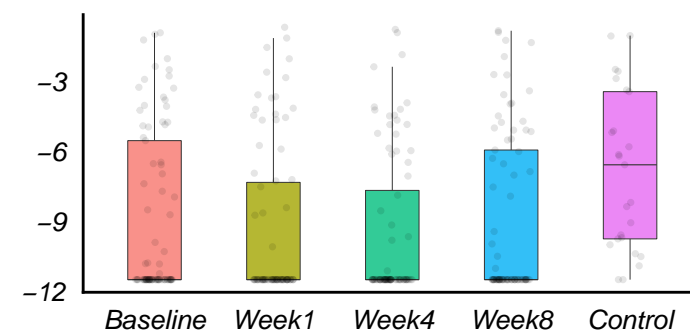**Eubacterium hallii**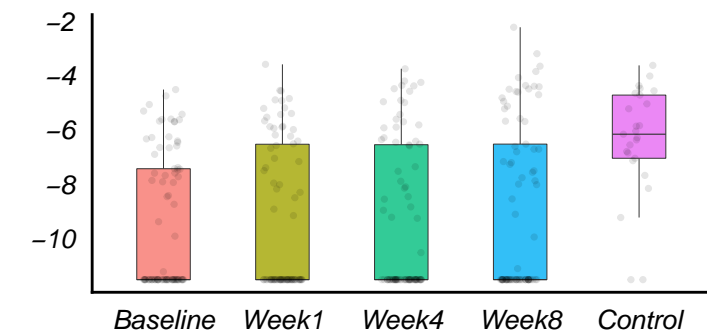**Eubacterium ramulus**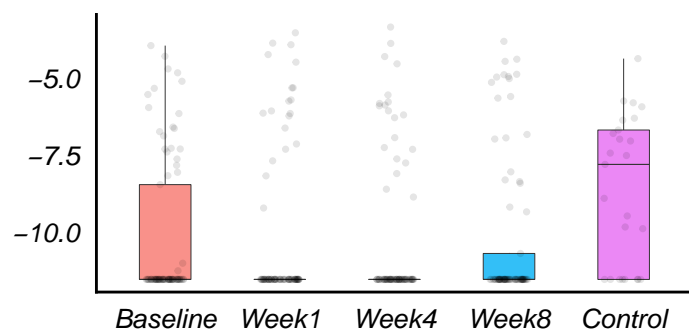**Alistipes shahii**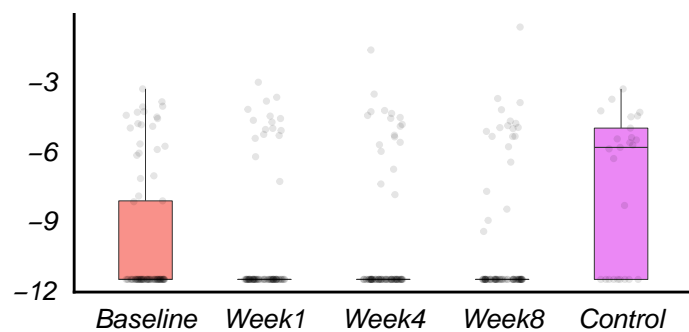**Clostridium leptum**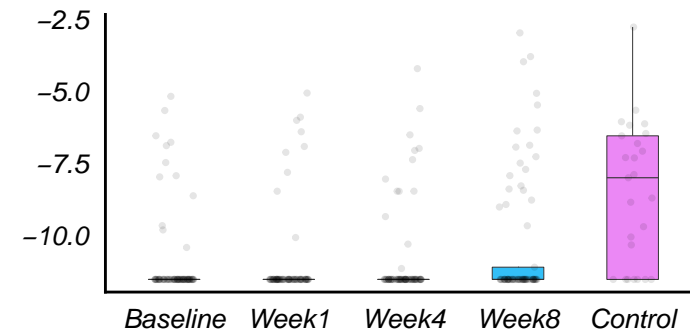**Alistipes onderdonkii**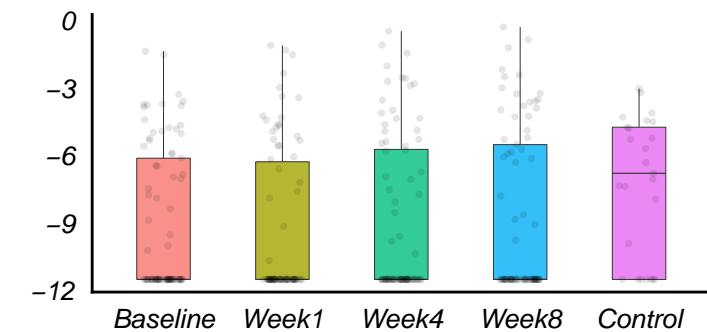**Odoribacter splanchnicus**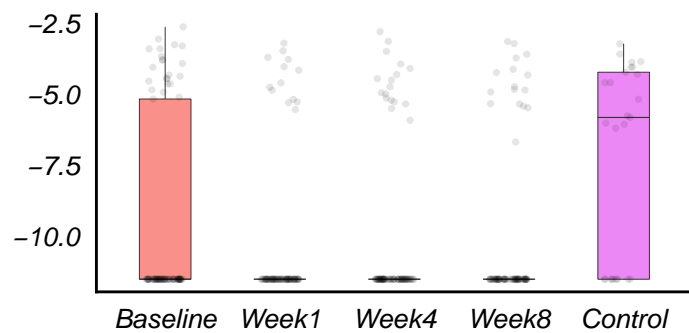**Eubacterium rectale**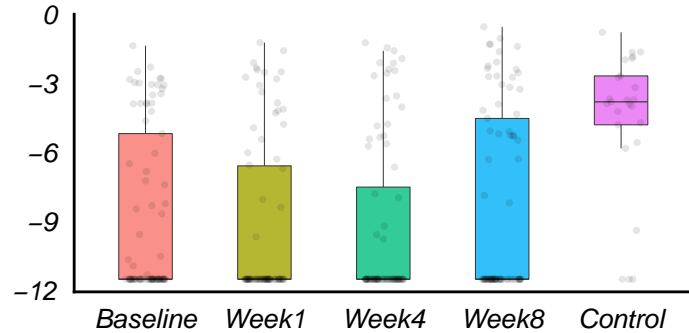**Ruminococcus bromii**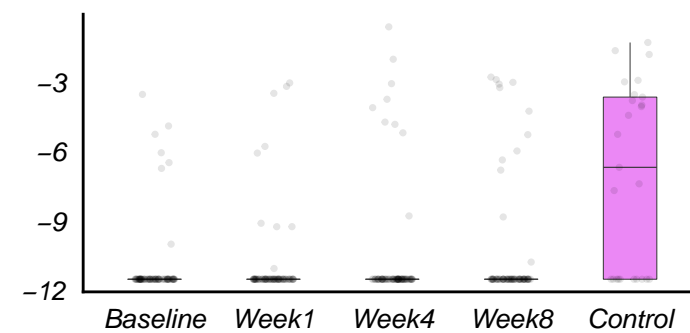**Lachnospiraceae bacterium 3 1 46FAA**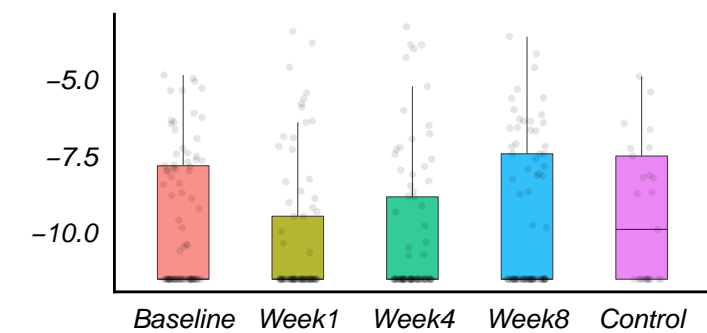

**Subdoligranulum spp**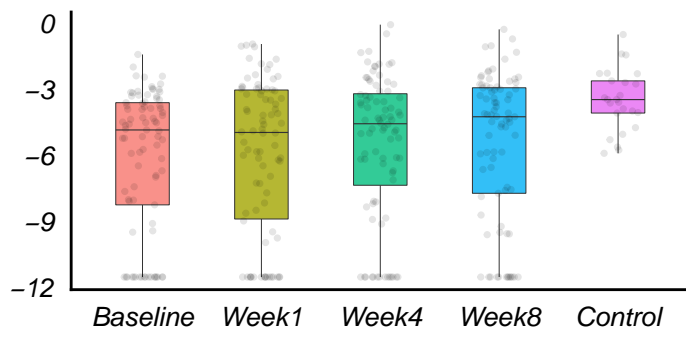**Parabacteroides merdae**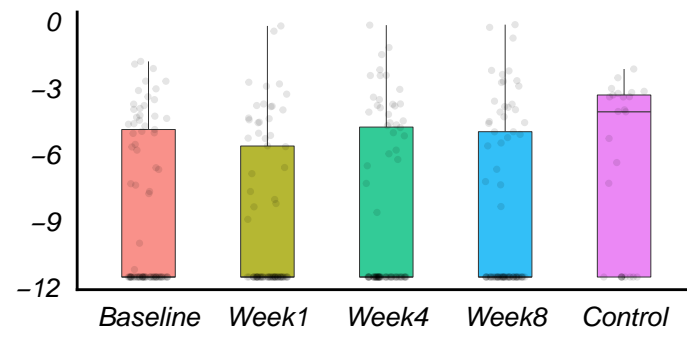**Eubacterium eligens**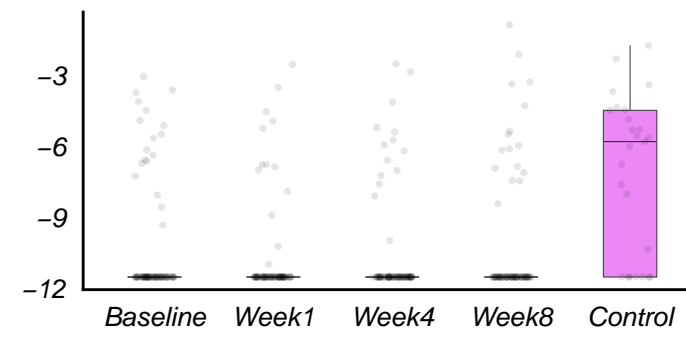**Lachnospiraceae bacterium 5 1 63FA**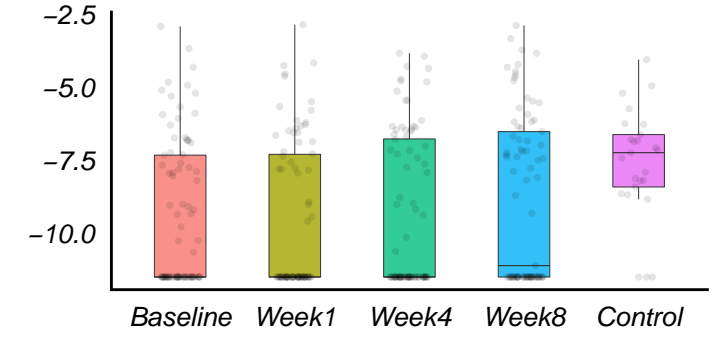**Eubacterium siraeum**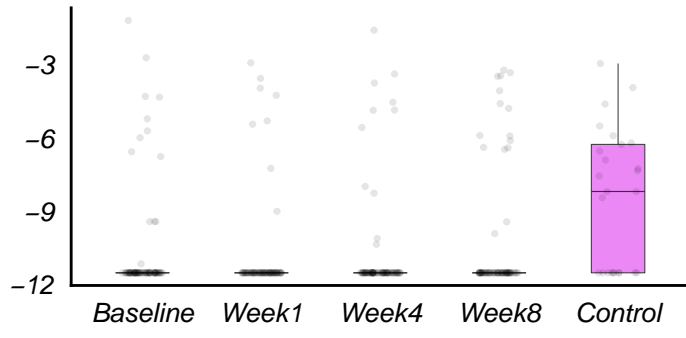**Parabacteroides distasonis**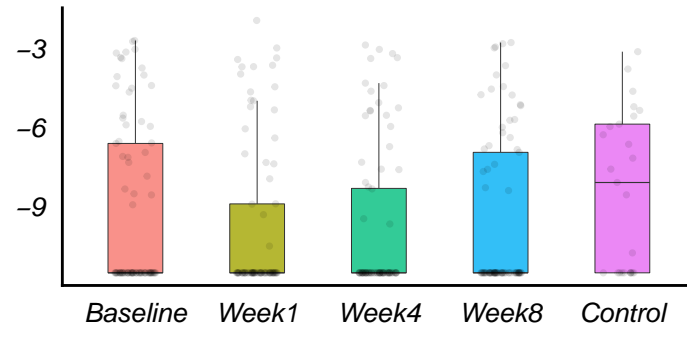**Bacteroides vulgatus**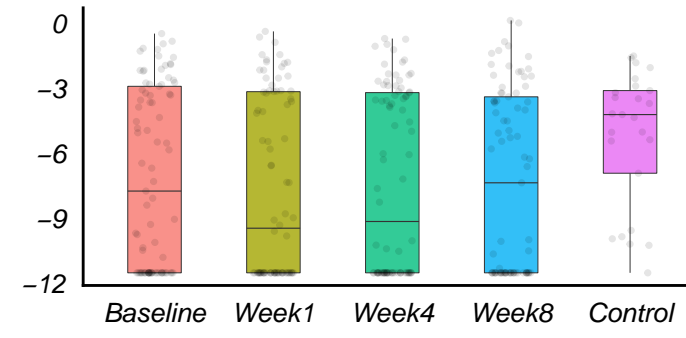**Bacteroidales bacterium ph8**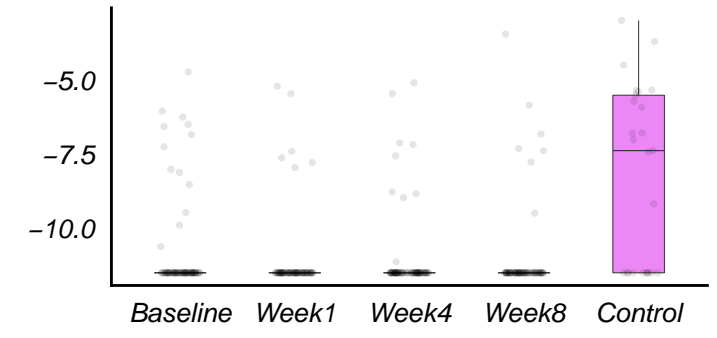**Coprococcus comes**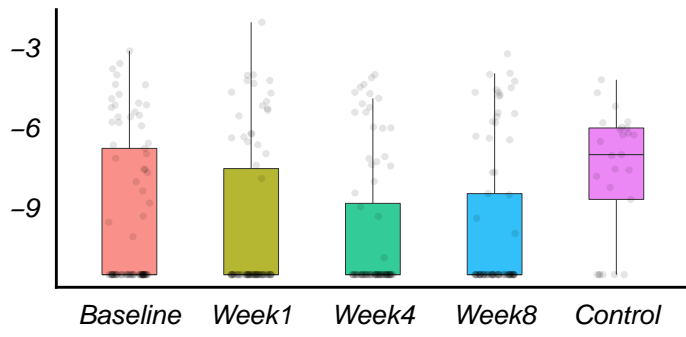**Clostridiaceae bacterium JC118**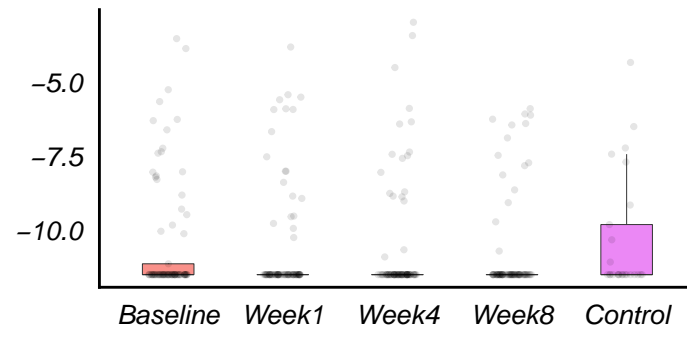**Clostridium asparagiforme**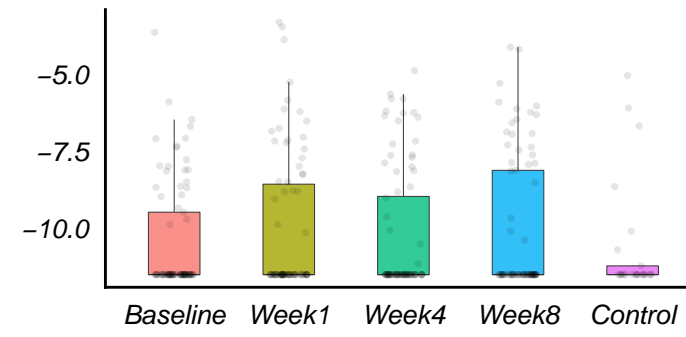**Anaerostipes hadrus**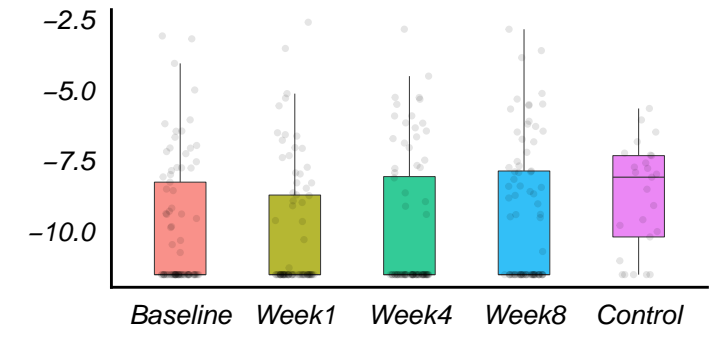**Bacteroides caccae**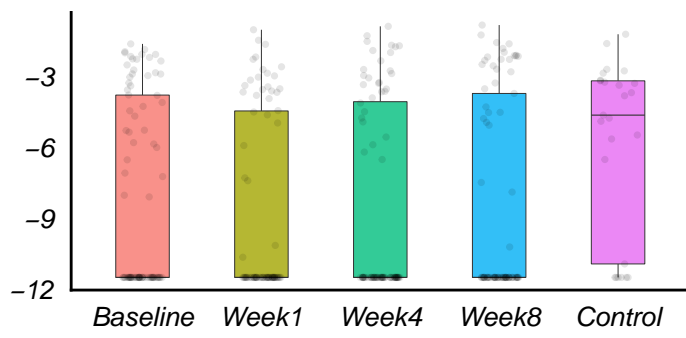**Eubacterium sp 3 1 31**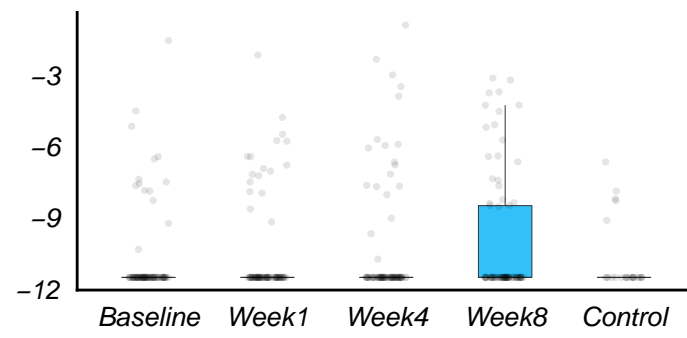**Anaerotruncus colihominis**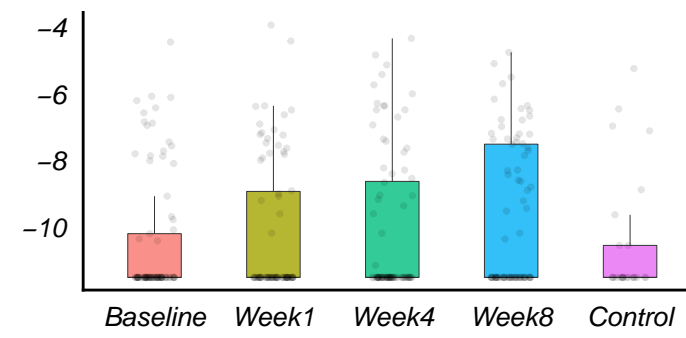**Bacteroides xylanisolvens**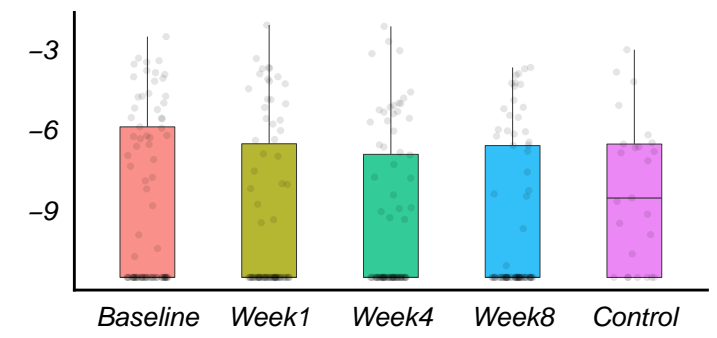**Holdemania filiformis**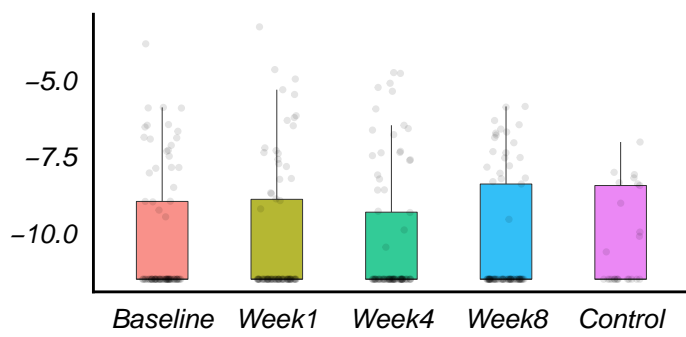**Bilophila spp**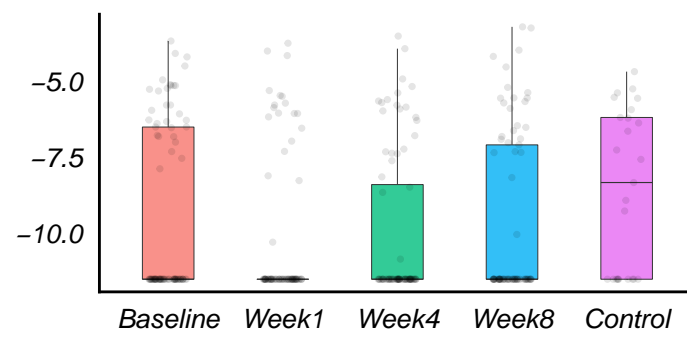**Clostridium bolteae**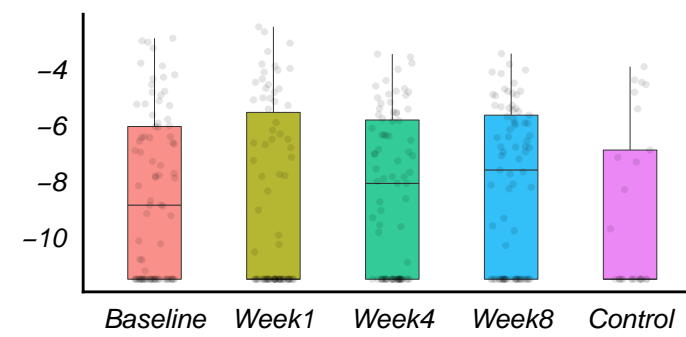**Ruminococcus lactaris**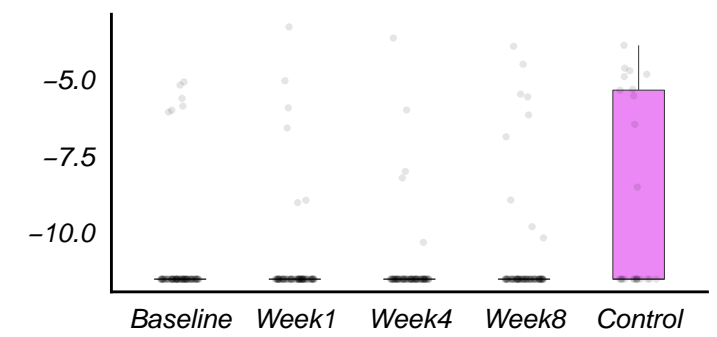

**Klebsiella pneumoniae**

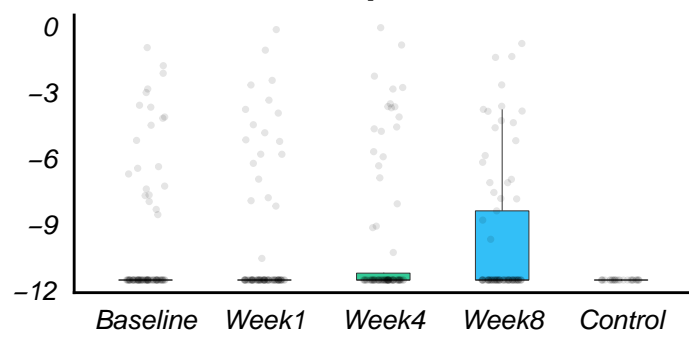

**Escherichia coli**

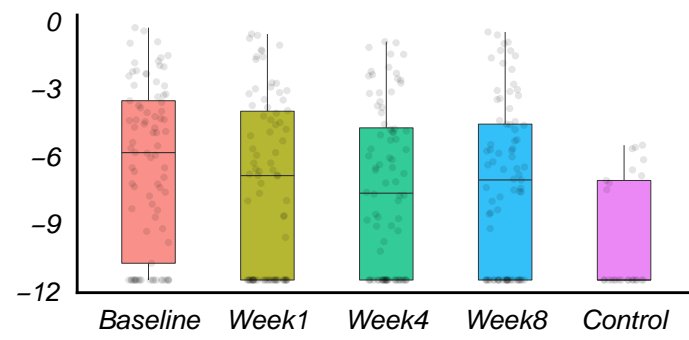

Supplement: Supplementary file [file 19011833-2.pdf]
